# Supplementary material
Source: PubMed Central journal article supplement (PMC3902182)
Supplement: NIHMS518874-supplement-Supplementary_File.pdf [file NIHMS518874-supplement-Supplementary_File.pdf]

**Web-based Supplementary Materials for  
 ”A note on score tests for homogeneity in two-component  
 parametric models for discrete data”  
 by D. Todem, W-W Hsu and KM Kim**

**Web Appendix A: Proof of the Proposition**

i) Proof of the first statement:

Note that  $\mu_i = h^{-1}(x'_i\beta)$  and under the null  $\pi_i = \tilde{g}(\mu_i)$ , which by substitution gives  $\pi_i = \tilde{g}(h^{-1}(x'_i\beta))$  for all  $i$ . Thus, a natural function  $f(\cdot)$  relating  $\pi_i$  to linear predictor  $z'_i\gamma$  is defined such that  $f = \tilde{g} \circ h^{-1}$ , in which case  $\pi_i = \tilde{g} \circ h^{-1}(z'_i\gamma)$ , where  $\circ$  represents the composite function operator.

ii) Proof of the second statement:

To show that the second statement of the proposition is true, we first consider the situation where  $\tilde{g}(\cdot)$  as a function of  $\mu_i$  is invertible. Therefore, the composition  $\tilde{g} \circ h^{-1}$  is invertible and the null hypothesis  $\tilde{g} \circ h^{-1}(z'_i\gamma) = \tilde{g} \circ h^{-1}(x'_i\beta)$ , for all  $i$ , then reduces to the simple form  $x'_i\beta = z'_i\gamma$  for all  $i$ . This ultimately reduces to a linear contrast of parameters  $\beta$  and  $\gamma$ . In particular, when  $x_i = z_i$ , for all  $i$ , the null hypothesis is given by  $H_0 : \beta = \gamma$ . Now we assume that  $\tilde{g}(\cdot)$  is not invertible. If  $x_i = z_i$ , for all  $i$ , the identifiability of the non-degenerate distribution  $G$  requires that  $\beta = \gamma$  under the null. When  $x_i \neq z_i$ , for some  $i$ , the identifiability condition of the non-degenerate distribution  $G$  ensures that the null reduces to a linear contrast that involves only the parameters  $\beta$  and  $\gamma$  under the null.

**Web Appendix B: Calculation of the information matrix  $\mathcal{I}(\theta, \alpha)$  for a mixture of a degenerate distribution at point  $y^*$  and a non-degenerate distribution  $G$ , assuming  $x_i = z_i$**

For any parametric non-degenerate distribution, the information matrix is defined as,

$$\mathcal{I}(\theta, \alpha) = \begin{pmatrix} \mathcal{I}_{\theta\theta}(\theta, \alpha) & \mathcal{I}_{\theta\alpha}(\theta, \alpha) \\ \mathcal{I}_{\alpha\theta}(\theta, \alpha) & \mathcal{I}_{\alpha\alpha}(\theta, \alpha) \end{pmatrix}$$

where,  $\mathcal{I}_{\theta\theta}(\theta, \alpha) = -E[\partial^2 \ell(\theta, \alpha) / \partial \theta \partial \theta']$ ,  $\mathcal{I}_{\theta\alpha}(\theta, \alpha) = -E[\partial^2 \ell(\theta, \alpha) / \partial \theta \partial \alpha'] = \mathcal{I}'_{\alpha\theta}(\theta, \alpha)$ ,  $\mathcal{I}_{\alpha\alpha}(\theta, \alpha) = -E[\partial^2 \ell(\theta, \alpha) / \partial \alpha \partial \alpha']$ . The calculation of these expectations is often tedious for any general parametric non-degenerate distribution. So we restrict our calculations to the observed information matrix. For this, we shall use the following notations,  $\dot{\pi}_{i,\alpha} = \partial \pi_i / \partial \alpha$ ,  $\dot{\pi}_{i,\theta} = \partial \pi_i / \partial \theta$ ,  $\ddot{\pi}_{i,\alpha\alpha} = \partial^2 \pi_i / \partial \alpha \partial \alpha'$ ,  $\ddot{\pi}_{i,\theta\alpha} = \partial^2 \pi_i / \partial \theta \partial \alpha'$ ,  $\ddot{\pi}_{i,\theta\theta} = \partial^2 \pi_i / \partial \theta \partial \theta'$ ,  $\tilde{b}_{i,\theta} = \frac{g_i(y_i)}{1-g_i(y^*)}$ ,  $\dot{\tilde{b}}_{i,\theta} = \partial \tilde{b}_{i,\theta} / \partial \theta$ ,  $\ddot{\tilde{b}}_{i,\theta\theta} = \partial^2 \tilde{b}_{i,\theta} / \partial \theta \partial \theta'$ . By using these notations, the second-order derivatives of log-likelihood function are then given by,

$$\begin{aligned} \frac{\partial^2 \ell(\theta, \alpha)}{\partial \theta \partial \theta'} &= \sum_{i=1}^n \left\{ \delta(y_i) \frac{\pi_i \ddot{\pi}_{i,\theta\theta} - \dot{\pi}_{i,\theta} \dot{\pi}'_{i,\theta}}{\pi_i^2} + (1 - \delta(y_i)) \frac{-\ddot{\pi}_{i,\theta\theta}(1 - \pi_i) - \dot{\pi}_{i,\theta} \dot{\pi}'_{i,\theta}}{(1 - \pi_i)^2} \right. \\ &\quad \left. + (1 - \delta(y_i)) \frac{\tilde{b}_{i,\theta} \ddot{\tilde{b}}_{i,\theta} - \dot{\tilde{b}}_{i,\theta} \dot{\tilde{b}}'_{i,\theta}}{\tilde{b}_{i,\theta}^2} \right\}, \\ \frac{\partial^2 \ell(\theta, \alpha)}{\partial \theta \partial \alpha'} &= \sum_{i=1}^n \left\{ \delta(y_i) \frac{\pi_i \ddot{\pi}_{i,\theta\alpha} - \dot{\pi}_{i,\theta} \dot{\pi}'_{i,\alpha}}{\pi_i^2} + (1 - \delta(y_i)) \frac{-\ddot{\pi}_{i,\theta\alpha}(1 - \pi_i) - \dot{\pi}_{i,\theta} \dot{\pi}'_{i,\alpha}}{(1 - \pi_i)^2} \right\}, \\ \frac{\partial^2 \ell(\theta, \alpha)}{\partial \alpha \partial \alpha'} &= \sum_{i=1}^n \left\{ \delta(y_i) \frac{\pi_i \ddot{\pi}_{i,\alpha\alpha} - \dot{\pi}_{i,\alpha} \dot{\pi}'_{i,\alpha}}{\pi_i^2} + (1 - \delta(y_i)) \frac{-\ddot{\pi}_{i,\alpha\alpha}(1 - \pi_i) - \dot{\pi}_{i,\alpha} \dot{\pi}'_{i,\alpha}}{(1 - \pi_i)^2} \right\}. \end{aligned}$$

### Web Appendix C: Calculation of $\mathcal{I}(\hat{\theta}, 0)$ when $G$ is a Poisson model and $y^* = 0$

If the non-degenerate distribution is a Poisson process, we have  $g_i(0) = \exp\{-\mu_i\}$  where  $\mu_i = \exp\{x_i' \beta\} = \exp\{x_i' \theta\}$ , with  $\theta = \beta$ . A natural parameterization for  $\pi_i$  is given by  $\pi_i = \exp\{-\exp\{z_i' \gamma\}\}$ . Assuming  $x_i = z_i$ , estimates of entries of the information matrix are given by,

$$\begin{aligned} \mathcal{I}_{\theta\theta}(\hat{\theta}, \mathbf{0}) &= \mathbf{x}' \text{diag} \left\{ \hat{\mu}_i (2 \exp\{-\hat{\mu}_i\} - 1) \right\}_{i=1}^n \mathbf{x}, \\ \mathcal{I}_{\theta\alpha}(\hat{\theta}, \mathbf{0}) &= \mathbf{x}' \text{diag} \left\{ -\frac{\hat{\mu}_i^2 \exp\{-\hat{\mu}_i\}}{1 - \exp\{-\hat{\mu}_i\}} \right\}_{i=1}^n \mathbf{x}, \\ \mathcal{I}_{\alpha\alpha}(\hat{\theta}, \mathbf{0}) &= \mathbf{x}' \text{diag} \left\{ \frac{\hat{\mu}_i^2 \exp\{-\hat{\mu}_i\}}{1 - \exp\{-\hat{\mu}_i\}} \right\}_{i=1}^n \mathbf{x}, \end{aligned}$$

where  $\mathbf{x} = (x'_1, x'_2, \dots, x'_n)'$  and  $\hat{\mu}_i = \exp\{x'_i \hat{\theta}\}$  with  $\hat{\theta}$  being the maximum likelihood estimator of  $\theta^*$  under  $H_0$ . In these expressions,  $\text{diag}\{a_i\}_{i=1}^n$  represents a diagonal matrix of order  $n$  with  $a_i, i = 1, \dots, n$  being the entries on the diagonal.

**Web Appendix D: Calculation of  $\mathcal{I}(\hat{\theta}, 0)$  when  $G$  is a binomial model and  $y^* = 0$**

If the non-degenerate distribution is a Binomial distribution with number of trials  $m_i$  and success probability  $\mu_i$ , then we have  $\mu_i = 1/(1 + \exp\{-x'_i \beta\}) = 1/(1 + \exp\{-x'_i \theta\})$ , with  $\theta = \beta$ . A natural parameterization for  $\pi_i$  is given by  $\pi_i = \{1 + \exp\{z'_i \gamma\}\}^{-m_i}$ . Assuming  $x_i = z_i$ , estimates of entries of the information matrix are given by,

$$\begin{aligned}\mathcal{I}_{\theta\theta}(\hat{\theta}, \mathbf{0}) &= \mathbf{x}' \text{diag} \left\{ \frac{m_i(1 - \hat{\mu}_i)^{m_i+2}(\hat{\mu}_i^2(1 - \hat{\mu}_i)^{-2} - 1)}{1 - (1 - \hat{\mu}_i)^{m_i}} + m_i \hat{\mu}_i(1 - \hat{\mu}_i) \right\}_{i=1}^n \mathbf{x} \\ \mathcal{I}_{\theta\alpha}(\hat{\theta}, \mathbf{0}) &= \mathbf{x}' \text{diag} \left\{ -\frac{m_i^2 \hat{\mu}_i^2 (1 - \hat{\mu}_i)^{m_i}}{1 - (1 - \hat{\mu}_i)^{m_i}} \right\}_{i=1}^n \mathbf{x}, \\ \mathcal{I}_{\alpha\alpha}(\hat{\theta}, \mathbf{0}) &= \mathbf{x}' \text{diag} \left\{ \frac{m_i^2 \hat{\mu}_i^2 (1 - \hat{\mu}_i)^{m_i}}{1 - (1 - \hat{\mu}_i)^{m_i}} \right\}_{i=1}^n \mathbf{x},\end{aligned}$$

where  $\mathbf{x} = (x'_1, x'_2, \dots, x'_n)'$  and  $\hat{\mu}_i = 1/(1 + \exp\{-x'_i \hat{\theta}\})$ , with  $\hat{\theta}$  being the maximum likelihood estimator for  $\theta^*$  under  $H_0$ .

**Web Appendix E: Components  $\hat{u}_\alpha$  of the score test statistic for commonly used  $G$  distributions**

For Poisson and binomial non degenerate distributions with  $\theta = \beta$ , the components  $\hat{u}_\alpha$  of the score test statistic when  $y^* = 0$  are respectively given by,  $\hat{u}_\alpha = \sum_{i=1}^n \left\{ x_i \hat{\mu}_i \left( \frac{\delta(y_i) - \exp\{-\hat{\mu}_i\}}{1 - \exp\{-\hat{\mu}_i\}} \right) \right\}$  and  $\hat{u}_\alpha = \sum_{i=1}^n \left\{ x_i m_i \hat{\mu}_i \left( \frac{\delta(y_i) - (1 - \hat{\mu}_i)^{m_i}}{1 - (1 - \hat{\mu}_i)^{m_i}} \right) \right\}$ . In these expressions,  $\hat{\mu}_i$  takes values  $\exp\{x'_i \hat{\theta}\}$  and  $\{1 + \exp\{-x'_i \hat{\theta}\}\}^{-1}$  for the Poisson and binomial non degenerate distributions, respectively.

### Web Appendix F: Additional simulation results when covariates $x_i$ and $z_i$ are not equal

Further simulation studies were conducted to compare the three tests when covariates  $x_i$  and  $z_i$  are not equal. We specifically considered the situation where  $x_i$  is a subset of  $z_i$ . Specifically, we take  $x_i = (1, x_{1i})'$  and  $z_i = (1, x_{1i}, x_{2i})'$ , where  $x_{1i} \sim \text{Uniform}(0, 1)$  and  $x_{2i} \sim \text{Uniform}(-2, 2)$ .

We then performed the proposed covariate-adjusted score test assuming the working mixing weight model  $\omega_i = \{\pi_i - \exp\{-\mu_i\}\}\{1 - \exp\{-\mu_i\}\}^{-1}$  under the alternative, where  $\pi_i = \exp\{-\exp\{\gamma_0 + \gamma_1 x_{1i} + \gamma_2 x_{2i}\}\}$  and  $\mu_i = \exp\{\beta_0 + \beta_1 x_{1i}\}$ . The test of van den Broek (1995) was performed assuming  $\omega_i = \gamma_0$ , and that of Jansakul and Hinde (2009), assuming  $\omega_i = \gamma_0 + \gamma_1 x_{1i} + \gamma_2 x_{2i}$ . With these parameterizations, the null hypotheses to be evaluated were then given by:  $H_0 : \gamma_0 = \beta_0, \gamma_1 = \beta_1, \gamma_2 = 0$ , for our formulation;  $H_0 : \gamma_0 = 0$ , for van den Broek's test; and  $H_0 : \gamma_0 = 0, \gamma_1 = 0, \gamma_2 = 0$ , for Jansakul and Hinde's test. The maximum likelihood estimate  $\hat{\beta}$  of the true value of  $\beta = (\beta_0, \beta_1)'$  under the null was obtained from a homogeneous Poisson model with mean  $\mu_i = \exp\{\beta_0 + \beta_1 x_{1i}\}$ . Results of these studies are given in Table 5. Findings from these studies are similar to those that assume  $x_i = z_i$ .

**Table 5**

*Empirical power of score test statistics to detect various forms  $\omega_i^*$  of heterogeneity coupled with a non-degenerate Poisson model with mean  $\mu_i^* = \exp\{\beta_0^* - 1.45x_{1i}\}$ ,  $x_{1i} \sim \text{Uniform}(0, 1)$ , at 5% significance level*

| $\beta_0^*$                                                                        | n=50  |       |       | n=100 |       |       | n=200 |       |       |
|------------------------------------------------------------------------------------|-------|-------|-------|-------|-------|-------|-------|-------|-------|
|                                                                                    | -0.75 | 0     | 0.75  | -0.75 | 0     | 0.75  | -0.75 | 0     | 0.75  |
| $\omega_i^* = 0.35 + 0.1x_{1i} - 0.15x_{2i}$                                       |       |       |       |       |       |       |       |       |       |
| vdB test                                                                           | 0.071 | 0.145 | 0.520 | 0.122 | 0.266 | 0.845 | 0.184 | 0.534 | 0.992 |
| J&H test                                                                           | 0.105 | 0.202 | 0.594 | 0.193 | 0.413 | 0.925 | 0.333 | 0.755 | 0.998 |
| Prop. c-a test                                                                     | 0.103 | 0.204 | 0.605 | 0.199 | 0.426 | 0.918 | 0.333 | 0.761 | 0.998 |
| $\omega_i^* = \frac{\exp\{-15+30x_{1i}-5x_{2i}\}}{1+\exp\{-15+30x_{1i}-5x_{2i}\}}$ |       |       |       |       |       |       |       |       |       |
| vdB test                                                                           | 0.043 | 0.064 | 0.109 | 0.044 | 0.082 | 0.153 | 0.058 | 0.105 | 0.216 |
| J&H test                                                                           | 0.122 | 0.177 | 0.377 | 0.179 | 0.331 | 0.628 | 0.275 | 0.542 | 0.864 |
| Prop. c-a test                                                                     | 0.134 | 0.237 | 0.643 | 0.210 | 0.455 | 0.911 | 0.338 | 0.769 | 0.996 |
| $\omega_i^* = \Phi(-15 + 30x_{1i} + 5x_{2i})$                                      |       |       |       |       |       |       |       |       |       |
| vdB test                                                                           | 0.055 | 0.064 | 0.100 | 0.040 | 0.062 | 0.126 | 0.058 | 0.118 | 0.237 |
| J&H test                                                                           | 0.105 | 0.194 | 0.364 | 0.165 | 0.316 | 0.587 | 0.295 | 0.557 | 0.878 |
| Prop. c-a test                                                                     | 0.115 | 0.257 | 0.636 | 0.189 | 0.444 | 0.913 | 0.354 | 0.769 | 0.998 |

Note:  $x_{2i} \sim \text{Uniform}(-2, 2)$ .

vdB: van den Broek, test with df=1. J&H: Jansakul & Hinde, test with df=3.

Prop. c-a: Proposed covariate-adjusted, test with df=3.
